# Supplementary material
Source: PubMed Central journal article supplement (PMC7050330)
Supplement: NIHMS1062538-supplement-SupplementalTables_Figures.pdf [file NIHMS1062538-supplement-SupplementalTables_Figures.pdf]

1 **SUPPLEMENTAL MATERIALS**

2 A. L. Dapper & B. A. Payseur. Molecular Evolution of the Meiotic Recombination Pathway in Mammals.

3

4 **Table S1:** Testes Expression Datasets (Barrett et al. 2012)

---

| <i>Species</i>                | <b>GEO Accession</b>                | <b>Reference</b>                             |
|-------------------------------|-------------------------------------|----------------------------------------------|
| <i>Bos taurus</i>             | GSM1020728 & GSM1020746             | (Merkin et al. 2012)                         |
| <i>Callithrix jacchus</i>     | GSM1227961, GSM1227962 & GSM1227963 | (Cortez et al. 2014)                         |
| <i>Canis lupus familiaris</i> | GSM747469 & GSM1359286              | (Derti et al. 2012; Vandewege et al. 2016)   |
| <i>Eptesicus fuscus</i>       | GSM1359287                          | (Vandewege et al. 2016)                      |
| <i>Equus caballus</i>         | GSM1139276 & GSM1359288             | (Coleman et al. 2013; Vandewege et al. 2016) |
| <i>Gorilla gorilla</i>        | GSM752663                           | (Brawand et al. 2011)                        |
| <i>Homo sapiens</i>           | GSM752707 & GSM752708               | (Brawand et al. 2011)                        |
| <i>Macaca mulatta</i>         | GSM752642 & GSM752643               | (Brawand et al. 2011)                        |
| <i>Mus musculus</i>           | GSM752629 & GSM752630               | (Brawand et al. 2011)                        |
| <i>Ovis aries</i>             | GSM1666944 & GSM1666936             | (Guan et al. 2017)                           |
| <i>Pan paniscus</i>           | GSM752690                           | (Brawand et al. 2011)                        |
| <i>Pan troglodytes</i>        | GSM752678                           | (Brawand et al. 2011)                        |
| <i>Pongo pygmaeus</i>         | GSM1858310 & GSM1858311             | (Carelli et al. 2016)                        |
| <i>Rattus norvegicus</i>      | GSM1278058                          | (Cortez et al. 2014)                         |
| <i>Sus scrofa</i>             | GSM1902350, GSM2033157 & GSM2033163 | (Li et al. 2016; Yang et al. 2017)           |
| <i>Tupaia chinensis</i>       | GSM957062                           | (Fan et al. 2013)                            |

5 **Table S2:** NCBI Reference Genomes (O’Leary et al. 2015)

| <i>Species</i>                | <b>Assembly</b>        | <b>RefSeq Accession</b> | <b>WGS Project Reference</b>                                |
|-------------------------------|------------------------|-------------------------|-------------------------------------------------------------|
| <i>Bos taurus</i>             | Bos_taurus_UMD_3.1.1   | GCF_000003055.6         | (Zimin et al. 2009)                                         |
| <i>Callithrix jacchus</i>     | Callithrix_jacchus-3.2 | GCF_000004665.1         | -                                                           |
| <i>Canis lupus familiaris</i> | CanFam3.1              | GCF_000002285.3         | (Lindblad-Toh et al. 2005)                                  |
| <i>Eptesicus fuscus</i>       | EptFus1.0              | GCF_000308155.1         | -                                                           |
| <i>Equus caballus</i>         | EquCab2.0              | GCF_000002305.2         | (Wade et al. 2009)                                          |
| <i>Gorilla gorilla</i>        | gorGor4                | GCF_000151905.2         | (Sعالى et al. 2012)                                         |
| <i>Homo sapiens</i>           | GRCh38.p10             | GCF_000001405.36        | -                                                           |
| <i>Macaca mulatta</i>         | Mmul_8.0.1             | GCF_000772875.2         | (Zimin et al. 2014)                                         |
| <i>Mus musculus</i>           | GRCm38.p5              | GCF_000001635.25        | -                                                           |
| <i>Ovis aries</i>             | Oar_v4.0               | GCF_000298735.2         | (International Sheep Genomics Consortium et al. 2010)       |
| <i>Pan paniscus</i>           | pampan1.1              | GCF_000258655.2         | (Prüfer et al. 2012)                                        |
| <i>Pan troglodytes</i>        | Pan_tro_3.0            | GCF_000001515.7         | (The Chimpanzee Sequencing Analysis Consortium et al. 2005) |
| <i>Pongo abelii</i>           | P_pygmaeus_2.0.2       | GCF_000001545.4         | (Locke et al. 2011)                                         |
| <i>Rattus norvegicus</i>      | Rnor_6.0               | GCF_000001895.5         | (Rat Genome Sequencing Project Consortium et al. 2004)      |
| <i>Sus scrofa</i>             | Sscrofa11.1            | GCF_000003025.6         | -                                                           |
| <i>Tupaia chinensis</i>       | TupChi_1.0             | GCF_000334495.1         | (Fan et al. 2013)                                           |

6 **Table S3:** Ensembl Reference Genomes (Zerbino et al. 2017)

| <i>Species</i>                | <b>Assembly</b>        | <b>RefSeq Accession</b> | <b>WGS Project Reference</b>                                |
|-------------------------------|------------------------|-------------------------|-------------------------------------------------------------|
| <i>Bos taurus</i>             | Bos.taurus_UMD.3.1     | GCF_000003055.3         | (Zimin et al. 2009)                                         |
| <i>Callithrix jacchus</i>     | Callithrix_jacchus-3.2 | GCF_000004665.1         | -                                                           |
| <i>Canis lupus familiaris</i> | CanFam3.1              | GCF_000002285.3         | (Lindblad-Toh et al. 2005)                                  |
| <i>Eptesicus fuscus</i>       | -                      | -                       | -                                                           |
| <i>Equus caballus</i>         | EquCab2.0              | GCF_000002305.2         | (Wade et al. 2009)                                          |
| <i>Gorilla gorilla</i>        | gorGor3.1              | GCF_000151905.1         | -                                                           |
| <i>Homo sapiens</i>           | GRCh38.p10             | GCF_000001405.36        | -                                                           |
| <i>Macaca mulatta</i>         | Mmul.8.0.1             | GCF_000772875.2         | (Zimin et al. 2014)                                         |
| <i>Mus musculus</i>           | GRCm38.p5              | GCF_000001635.25        | -                                                           |
| <i>Ovis aries</i>             | Oar_v3.1               | GCF_000298735.1         | (International Sheep Genomics Consortium et al. 2010)       |
| <i>Pan paniscus</i>           | pampan1.1              | GCF_000258655.2         | (Prüfer et al. 2012)                                        |
| <i>Pan troglodytes</i>        | CHIMP2.1.4             | GCF_000001515.6         | (The Chimpanzee Sequencing Analysis Consortium et al. 2005) |
| <i>Pongo abelii</i>           | PPYG2                  | GCF_000001545.4         | (Locke et al. 2011)                                         |
| <i>Rattus norvegicus</i>      | Rnor_6.0               | GCF_000001895.5         | (Rat Genome Sequencing Project Consortium et al. 2004)      |
| <i>Sus scrofa</i>             | Sscrofa11.1            | GCF_000003025.6         | -                                                           |
| <i>Tupaia chinensis</i>       | -                      | -                       | -                                                           |

7 **Table S4:** Evolutionary rates and tests for positive selection across mammals at 32 recombination genes using the  
8 gene tree. Genes are organized by step in the pathway, as labeled in Figure 3. (Yang 2007).

| <i>Gene</i>                                      | <i>bp</i> | <i>N</i> | $\omega$ | <i>M</i> | <i>M1-M2</i> | <i>p-value</i> | <i>M7-M8</i> | <i>p-value</i>    | <i>M8a-M8</i> | <i>p-value</i> |
|--------------------------------------------------|-----------|----------|----------|----------|--------------|----------------|--------------|-------------------|---------------|----------------|
| <b>(A) DSB Formation</b>                         |           |          |          |          |              |                |              |                   |               |                |
| <i>HORMAD1</i>                                   | 1212      | 16       | 0.3037   | 7        | 0            | 1.000          | 3.135        | 0.2086            | —             | —              |
| <i>MEI4</i>                                      | 1170      | 16       | 0.4310   | 7        | 0            | 1.000          | 0.058        | 0.9715            | —             | —              |
| <i>REC114</i>                                    | 870       | 15       | 0.4237   | 7        | 0            | 1.000          | 4.1874       | 0.1232            | —             | —              |
| <i>IHO1</i>                                      | 1824      | 16       | 0.7099   | 8        | 13.384       | <b>0.0012</b>  | 17.714       | <b>0.0001</b>     | 14.707        | <b>0.0001</b>  |
| <i>SPO11</i>                                     | 1188      | 15       | 0.1701   | 7        | 0            | 1.000          | 4.697        | 0.0955            | —             | —              |
| <b>(B) DSB Processing</b>                        |           |          |          |          |              |                |              |                   |               |                |
| <i>HORMAD2</i>                                   | 981       | 15       | 0.3290   | 1        | 0            | 1.000          | 3.881        | 0.1436            | —             | —              |
| <i>MRE11</i>                                     | 2136      | 16       | 0.1686   | 8        | 0.636        | 0.7277         | 12.014       | <b>0.0025</b>     | 4.822         | <b>0.0281</b>  |
| <i>NBS1</i>                                      | 2289      | 15       | 0.4185   | 8        | 0            | 1.000          | 12.899       | <b>0.0016</b>     | 4.298         | <b>0.0382</b>  |
| <i>RAD50</i>                                     | 3936      | 16       | 0.0322   | 1        | 0            | 1.000          | 0.5615       | 0.7552            | —             | —              |
| <i>BRCC3</i>                                     | 954       | 15       | 0.0601   | 7        | 0            | 1.000          | 0.573        | 0.7509            | —             | —              |
| <b>(C) Homology Search &amp; Strand Invasion</b> |           |          |          |          |              |                |              |                   |               |                |
| <i>DMC1</i>                                      | 1020      | 15       | 0.0365   | 7        | 0            | 1.000          | 4.288        | 0.1172            | —             | —              |
| <i>RAD51</i>                                     | 1017      | 16       | 0.0322   | 1        | 0            | 1.000          | 0.562        | 0.7552            | —             | —              |
| <i>SPATA22</i>                                   | 1101      | 16       | 0.4932   | 7        | 0            | 1.000          | 0.200        | 0.9049            | —             | —              |
| <i>MEIOB</i>                                     | 1425      | 16       | 0.2340   | 7        | 0            | 1.000          | 0.221        | 0.8955            | —             | —              |
| <i>MCMDC2</i>                                    | 2052      | 16       | 0.2242   | 7        | 0            | 1.000          | 0.610        | 0.7370            | —             | —              |
| <b>(D) Synapsis</b>                              |           |          |          |          |              |                |              |                   |               |                |
| <i>REC8</i>                                      | 1833      | 16       | 0.3698   | 8        | 0            | 1.000          | 14.690       | <b>0.0006</b>     | 5.927         | <b>0.0149</b>  |
| <i>RAD21L</i>                                    | 1686      | 15       | 0.503    | 8        | 12.124       | <b>0.0023</b>  | 32.050       | <b>&gt;0.0001</b> | 12.049        | <b>0.0005</b>  |
| <i>SYCP1</i>                                     | 3015      | 16       | 0.4337   | 8        | 8.711        | <b>0.0128</b>  | 26.860       | <b>&gt;0.0001</b> | 9.243         | <b>0.0024</b>  |
| <i>SYCP2</i>                                     | 4650      | 16       | 0.5572   | 8        | 11.584       | <b>0.0031</b>  | 37.200       | <b>&gt;0.0001</b> | 15.838        | <b>0.0001</b>  |
| <i>TEX12</i>                                     | 369       | 14       | 0.2297   | 7        | 0.0565       | 0.9721         | 1.549        | 0.4610            | —             | —              |

9 **Table S4:** Cont.

| <i>Gene</i>                | <i>bp</i> | <i>N</i> | $\omega$ | <i>M</i> | <i>M1-M2</i> | <i>p-value</i>    | <i>M7-M8</i> | <i>p-value</i>    | <i>M8a-M8</i> | <i>p-value</i>    |
|----------------------------|-----------|----------|----------|----------|--------------|-------------------|--------------|-------------------|---------------|-------------------|
| <b>(E) CO/NCO Decision</b> |           |          |          |          |              |                   |              |                   |               |                   |
| <i>TEX11</i>               | 2844      | 15       | 0.8483   | <b>8</b> | 60.872       | <b>&gt;0.0001</b> | 82.665       | <b>&gt;0.0001</b> | 61.141        | <b>&gt;0.0001</b> |
| <i>SHOC1</i>               | 4644      | 16       | 0.6113   | <b>8</b> | 12.447       | <b>0.0020</b>     | 30.561       | <b>&gt;0.0001</b> | 15.645        | <b>0.0001</b>     |
| <i>RNF212</i>              | 948       | 16       | 0.5014   | <b>8</b> | 0            | <i>1.000</i>      | 16.366       | <b>0.0003</b>     | 5.202         | <b>0.0226</b>     |
| <i>RNF212B</i>             | 906       | 14       | 0.4066   | 7        | 0            | <i>1.000</i>      | 0.500        | <i>0.7788</i>     | —             | —                 |
| <i>MSH4</i>                | 2814      | 16       | 0.2132   | <b>8</b> | 16.608       | <b>0.0002</b>     | 39.447       | <b>&gt;0.0001</b> | 23.238        | <b>&gt;0.0001</b> |
| <i>MSH5</i>                | 2565      | 15       | 0.1642   | 7        | 0            | <i>1.000</i>      | 4.214        | <i>0.1216</i>     | —             | —                 |
| <b>(F) Resolution</b>      |           |          |          |          |              |                   |              |                   |               |                   |
| <i>MER3</i>                | 4458      | 16       | 0.3633   | 8a       | 0            | <i>1.000</i>      | 12.838       | <b>0.0016</b>     | 3.109         | <i>0.0779</i>     |
| <i>CNTD1</i>               | 1026      | 15       | 0.2496   | 7        | 0            | <i>1.000</i>      | 0.936        | <i>0.6263</i>     | —             | —                 |
| <i>HEI10</i>               | 831       | 15       | 0.1226   | 7        | 0            | <i>1.000</i>      | 0.250        | <i>0.8826</i>     | —             | —                 |
| <i>MLH1</i>                | 2313      | 15       | 0.1652   | 8a       | 0            | <i>1.000</i>      | 12.221       | <b>0.0022</b>     | 0.280         | <i>0.5970</i>     |
| <i>MLH3</i>                | 4419      | 16       | 0.4444   | 7        | 0            | <i>1.000</i>      | 3.757        | <i>0.1528</i>     | —             | —                 |
| <i>MUS81</i>               | 1665      | 16       | 0.2124   | 7        | 0            | <i>1.000</i>      | 0.628        | <i>0.7304</i>     | —             | —                 |

10 **Table S5:** Comparisons of polymorphism within humans (African/African-American) to divergence between human  
 11 and macaque at recombination genes.

| Gene                                             | Pn | Ps | Dn | Ds | MK Test           | NI            | DoS           | Direction |
|--------------------------------------------------|----|----|----|----|-------------------|---------------|---------------|-----------|
| <b>(A) DSB Formation</b>                         |    |    |    |    |                   |               |               |           |
| <i>HORMAD1</i>                                   | 17 | 5  | 5  | 12 | <b>0.0040</b>     | 8.16          | -0.4786       | Neg.      |
| <i>MEI4</i>                                      | 6  | 3  | 24 | 9  | 0.6987            | <b>0.75</b>   | <b>0.0606</b> | —         |
| <i>REC114</i>                                    | 17 | 8  | 11 | 14 | 0.1536            | 2.705         | -0.2400       | —         |
| <i>IHO1</i>                                      | 31 | 16 | 36 | 19 | 1.000             | 1.0226        | -0.0050       | —         |
| <i>SPO11</i>                                     | 22 | 9  | 11 | 22 | <b>0.0058</b>     | 4.8889        | -0.3763       | Neg.      |
| <b>(B) DSB Processing</b>                        |    |    |    |    |                   |               |               |           |
| <i>HORMAD2</i>                                   | 24 | 5  | 7  | 9  | <b>0.0164</b>     | 6.1714        | -0.3901       | Neg.      |
| <i>MRE11</i>                                     | 43 | 16 | 5  | 35 | <b>&lt;0.0001</b> | 18.8125       | -0.6038       | Neg.      |
| <i>NBS1</i>                                      | 49 | 19 | 34 | 25 | 0.0963            | 1.8693        | -0.1443       | —         |
| <i>RAD50</i>                                     | 57 | 24 | 8  | 43 | <b>&lt;0.0001</b> | 12.7656       | -0.5468       | Neg.      |
| <i>BRCC3</i>                                     | 6  | 4  | 2  | 6  | 0.1880            | 4.5000        | -0.3500       | —         |
| <b>(C) Homology Search &amp; Strand Invasion</b> |    |    |    |    |                   |               |               |           |
| <i>DMC1</i>                                      | 11 | 8  | 0  | 11 | <b>0.0002</b>     | —             | -0.5789       | Neg.      |
| <i>RAD51</i>                                     | 9  | 8  | 0  | 13 | <b>0.0033</b>     | —             | -0.5294       | Neg.      |
| <i>SPATA22</i>                                   | 26 | 10 | 21 | 10 | 0.7900            | 1.2381        | -0.0448       | —         |
| <i>MEIOB</i>                                     | 23 | 11 | 20 | 22 | 0.1000            | 2.300         | -0.2003       | —         |
| <i>MCMD2</i>                                     | 44 | 16 | 16 | 26 | <b>&lt;0.0001</b> | 4.4688        | -0.3524       | Neg.      |
| <b>(D) Synapsis</b>                              |    |    |    |    |                   |               |               |           |
| <i>REC8</i>                                      | 38 | 10 | 38 | 31 | <b>0.0101</b>     | 3.1000        | -0.2409       | Neg.      |
| <i>RAD21L</i>                                    | 18 | 9  | 27 | 13 | 1.000             | <b>0.9630</b> | <b>0.0083</b> | —         |
| <i>SYCP1</i>                                     | 36 | 27 | 33 | 27 | textit0.8570      | 1.0909        | -0.0214       | —         |

12 **Table S5:** Cont.

| Gene                       | Pn  | Ps | Dn | Ds | MK Test           | NI            | DoS           | Direction |
|----------------------------|-----|----|----|----|-------------------|---------------|---------------|-----------|
| <b>(D) Synapsis Cont.</b>  |     |    |    |    |                   |               |               |           |
| <i>SYCP2</i>               | 108 | 33 | 74 | 53 | <b>0.0016</b>     | 2.3440        | -0.1833       | Neg.      |
| <i>TEX12</i>               | 6   | 6  | 2  | 4  | <i>0.6380</i>     | 2.0000        | -0.1667       | —         |
| <b>(E) CO/NCO Decision</b> |     |    |    |    |                   |               |               |           |
| <i>TEX11</i>               | 26  | 14 | 55 | 25 | <i>0.6846</i>     | <b>0.8442</b> | <b>0.0375</b> | —         |
| <i>SHOC1</i>               | 79  | 39 | 85 | 37 | <i>0.6788</i>     | <b>0.8817</b> | <b>0.0272</b> | —         |
| <i>RNF212B</i>             | 4   | 0  | 8  | 12 | <i>0.0932</i>     | 4.1830        | -0.3418       | —         |
| <i>MSH4</i>                | 44  | 23 | 24 | 29 | <b>0.0279</b>     | 2.3116        | -0.2039       | Neg.      |
| <i>MSH5</i>                | 49  | 22 | 19 | 33 | <b>0.0005</b>     | 3.8684        | -0.3248       | Neg.      |
| <b>(F) Resolution</b>      |     |    |    |    |                   |               |               |           |
| <i>MER3</i>                | 80  | 34 | 54 | 44 | <b>0.0319</b>     | 1.9172        | -0.1507       | Neg.      |
| <i>CNTD1</i>               | 18  | 9  | 12 | 8  | <i>0.7689</i>     | 1.2308        | -0.0476       | —         |
| <i>HEI10</i>               | 17  | 13 | 4  | 5  | <i>0.7062</i>     | 1.6346        | -0.1222       | —         |
| <i>MLH1</i>                | 53  | 12 | 9  | 29 | <b>&lt;0.0001</b> | 14.2315       | -0.5785       | Neg.      |
| <i>MLH3</i>                | 106 | 40 | 77 | 57 | <b>0.0085</b>     | 1.9617        | -0.1514       | Neg.      |
| <i>MUS81</i>               | 48  | 27 | 17 | 40 | <b>0.0001</b>     | 4.1830        | -0.3418       | Neg.      |

13 **Table S6:** Sequence divergence between human (*Homo sapiens*) and macaque (*Macaca mulatta*) for 32 recombination  
14 genes (Yang and Nielsen 2000; Yang 2007).

| <i>Gene</i>                                      | <i>bp</i> | $\omega$      | <i>S</i> | <i>N</i> | <i>t</i> | $\kappa$ | <i>dN</i>         | <i>dS</i>         |
|--------------------------------------------------|-----------|---------------|----------|----------|----------|----------|-------------------|-------------------|
| <b>(A) DSB Formation</b>                         |           |               |          |          |          |          |                   |                   |
| <i>HORMAD1</i>                                   | 1182      | <b>0.0901</b> | 273.9    | 908.1    | 0.0443   | 3.8819   | 0.0044 +- 0.0022  | 0.0490 +- 0.0137  |
| <i>MEI4</i>                                      | 1167      | <b>0.7252</b> | 331      | 824      | 0.0822   | 4.6295   | 0.0247 +/- 0.0056 | 0.0341 +/- 0.0104 |
| <i>REC114</i>                                    | 864       | <b>0.3239</b> | 237.2    | 557.8    | 0.0974   | 2.9455   | 0.0200 +/- 0.0061 | 0.0618 +/- 0.0168 |
| <i>IHO1</i>                                      | 1797      | <b>0.6608</b> | 509      | 1273     | 0.0951   | 3.6035   | 0.0276 +- 0.0047  | 0.0418 +- 0.0094  |
| <i>SPO11</i>                                     | 1188      | <b>0.1434</b> | 291.2    | 896.8    | 0.0872   | 2.5317   | 0.0118 +/- 0.0036 | 0.0823 +/- 0.0178 |
| <b>(B) DSB Processing</b>                        |           |               |          |          |          |          |                   |                   |
| <i>HORMAD2</i>                                   | 921       | <b>0.295</b>  | 256.7    | 664.3    | 0.0531   | 4.2164   | 0.0106 +- 0.0040  | 0.0360 +- 0.0121  |
| <i>MRE11</i>                                     | 2124      | <b>0.0392</b> | 479.4    | 1644.6   | 0.0597   | 2.6154   | 0.0030 +- 0.0014  | 0.0778 +- 0.0135  |
| <i>NBS1</i>                                      | 2265      | <b>0.4155</b> | 553.7    | 1705.3   | 0.0804   | 5.0955   | 0.0199 +- 0.0035  | 0.0480 +- 0.0097  |
| <i>RAD50</i>                                     | 3969      | <b>0.0714</b> | 1118.7   | 2817.3   | 0.0401   | 5.0903   | 0.0028 +- 0.0010  | 0.0399 +- 0.0062  |
| <i>BRCC3</i>                                     | 951       | <b>0.0979</b> | 264      | 609      | 0.028    | 4.6      | 0.0025 +- 0.0020  | 0.0252 +- 0.0100  |
| <b>(C) Homology Search &amp; Strand Invasion</b> |           |               |          |          |          |          |                   |                   |
| <i>DMC1</i>                                      | 1020      | <b>0.0000</b> | 273.7    | 746.3    | 0.0335   | 5.1279   | 0.0000 +- 0.0000  | 0.0416 +- 0.0127  |
| <i>RAD51</i>                                     | 1017      | <b>0.0000</b> | 306.5    | 710.5    | 0.0398   | 6.7467   | 0.0000 +- 0.0000  | 0.0441 +- 0.0124  |
| <i>SPATA22</i>                                   | 1089      | <b>0.4523</b> | 247.8    | 841.2    | 0.0879   | 3.6505   | 0.0230 +- 0.0053  | 0.0508 +- 0.0150  |
| <i>MEIOB</i>                                     | 1413      | <b>0.2462</b> | 348.9    | 1064.1   | 0.0927   | 4.3887   | 0.0176 +- 0.0041  | 0.0715 +- 0.0151  |
| <i>MCMDC2</i>                                    | 2043      | <b>0.2108</b> | 534      | 1509     | 0.0635   | 7.8547   | 0.0107 +- 0.0027  | 0.0507 +- 0.0101  |
| <b>(D) Synapsis</b>                              |           |               |          |          |          |          |                   |                   |
| <i>REC8</i>                                      | 1701      | <b>0.477</b>  | 497      | 1138     | 0.1293   | 2.8869   | 0.0323 +- 0.0054  | 0.0678 +- 0.0122  |
| <i>RAD21L</i>                                    | 1680      | <b>0.6334</b> | 427.5    | 1237.5   | 0.0735   | 5.6876   | 0.0213 +- 0.0042  | 0.0337 +- 0.0091  |
| <i>SYCP1</i>                                     | 2928      | <b>0.3676</b> | 761.6    | 2166.4   | 0.0628   | 4.8307   | 0.0145 +- 0.0026  | 0.0393 +- 0.0074  |
| <i>SYCP2</i>                                     | 4590      | <b>0.3873</b> | 1070.7   | 3519.3   | 0.0854   | 5.994    | 0.0208 +- 0.0025  | 0.0537 +- 0.0074  |
| <i>TEX12</i>                                     | 369       | <b>0.1349</b> | 80.2     | 288.8    | 0.05     | 1.9678   | 0.0070 +- 0.0049  | 0.0516 +- 0.0260  |



| <i>Gene</i>                | <i>bp</i> | $\omega$      | <i>S</i> | <i>N</i> | <i>t</i> | $\kappa$ | <i>dN</i>        | <i>dS</i>        |
|----------------------------|-----------|---------------|----------|----------|----------|----------|------------------|------------------|
| <b>(E) CO/NCO Decision</b> |           |               |          |          |          |          |                  |                  |
| <i>TEX11</i>               | 2775      | <b>0.9068</b> | 805.9    | 1933.1   | 0.0897   | 7.8022   | 0.0290 +- 0.0040 | 0.0320 +- 0.0064 |
| <i>SHOC1</i>               | 4332      | <b>0.7225</b> | 1203     | 3129     | 0.0865   | 9.5737   | 0.0261 +- 0.0029 | 0.0361 +- 0.0057 |
| <i>RNF212</i>              | 816       | <b>0.387</b>  | 243.2    | 572.8    | 0.1342   | 4.996    | 0.0304 +- 0.0074 | 0.0785 +- 0.0189 |
| <i>RNF212B</i>             | 900       | <b>0.2566</b> | 255.6    | 644.4    | 0.0685   | 3.4122   | 0.0125 +- 0.0044 | 0.0488 +- 0.0143 |
| <i>MSH4</i>                | 2808      | <b>0.2635</b> | 731.3    | 2073.7   | 0.058    | 7.5194   | 0.0112 +- 0.0023 | 0.0425 +- 0.0079 |
| <i>MSH5</i>                | 2502      | <b>0.2106</b> | 728.7    | 1770.3   | 0.0643   | 3.9993   | 0.0102 +- 0.0024 | 0.0486 +- 0.0085 |
| <b>(F) Resolution</b>      |           |               |          |          |          |          |                  |                  |
| <i>MER3</i>                | 4305      | <b>0.3247</b> | 987.6    | 3317.4   | 0.0703   | 7.0099   | 0.0159 +- 0.0022 | 0.0488 +- 0.0074 |
| <i>CNTD1</i>               | 990       | <b>0.6803</b> | 335.3    | 651.7    | 0.065    | 8.0721   | 0.0187 +- 0.0054 | 0.0274 +- 0.0092 |
| <i>HEI10</i>               | 1059      | <b>0.3235</b> | 241.5    | 589.5    | 0.0329   | 5.9591   | 0.0068 +- 0.0034 | 0.0211 +- 0.0095 |
| <i>MLH1</i>                | 2268      | <b>0.0924</b> | 602.3    | 1665.7   | 0.0522   | 2.4752   | 0.0048 +- 0.0017 | 0.0521 +- 0.0097 |
| <i>MLH3</i>                | 4368      | <b>0.4919</b> | 1209.8   | 3149.2   | 0.0949   | 6.4296   | 0.0246 +- 0.0028 | 0.0500 +- 0.0067 |
| <i>MUS81</i>               | 1653      | <b>0.1299</b> | 465.8    | 1187.2   | 0.1106   | 5.7915   | 0.0128 +- 0.0033 | 0.0983 +- 0.0158 |

16 **Table S7** – Recombination rate data used for comparative analysis, including: species, sex, autosomal fundamental  
 17 number (aFN), autosomal haploid chromosome number (aHCN), estimate of the average number of *MLH1* foci per  
 18 cell, and the reference.

| <i>Species</i>                | <i>Sex</i> | <i>aFN</i> | <i>aHCN</i> | <i>MLH1 foci / cell</i> | <i>Reference</i>          |
|-------------------------------|------------|------------|-------------|-------------------------|---------------------------|
| <i>Bos taurus</i>             | M          | 58         | 29          | 47.53                   | (Fröhlich et al. 2015)    |
| <i>Canis lupus familiaris</i> | M          | 76         | 38          | 38.89                   | (Fröhlich et al. 2015)    |
| <i>Equus caballus</i>         | M          | 88         | 31          | 50.12                   | (Al-Jaru et al. 2014)     |
| <i>Homo sapiens</i>           | M          | 78         | 22          | 49.8                    | (Hassold et al. 2004)     |
| <i>Macaca mulatta</i>         | M          | 80         | 20          | 39                      | (Hassold et al. 2009)     |
| <i>Mus musculus</i>           | M          | 38         | 19          | 28.5                    | (Dumont and Payseur 2011) |
| <i>Ovis aries</i>             | M          | 58         | 26          | 62.9                    | (Fröhlich et al. 2015)    |
| <i>Rattus norvegicus</i>      | M          | 62         | 20          | 34.46                   | (Dumont and Payseur 2011) |
| <i>Sus scrofa</i>             | M          | 60         | 18          | 32                      | (Mary et al. 2014)        |

19 **Table S8:** Correlations between substitution rate and recombination rate, measured as the average number of *MLH1*  
20 foci per cell divided by the autosomal haploid chromosome number (aHCN), across nine species of mammals for 31  
21 recombination genes. The posterior probability ( 1 – posterior probability for negative correlations) is given in  
22 parentheses.

| Gene                                             | Correlation Coefficient |               |                 | Partial Correlation Coefficient |               |                 |
|--------------------------------------------------|-------------------------|---------------|-----------------|---------------------------------|---------------|-----------------|
|                                                  | dS - $\omega$           | dS - MLH1     | $\omega$ - MLH1 | dS - $\omega$                   | dS - MLH1     | $\omega$ - MLH1 |
| <b>(A) DSB Formation</b>                         |                         |               |                 |                                 |               |                 |
| <i>HORMAD1</i>                                   | 0.812( <b>0.95</b> )    | 0.492(0.85)   | 0.341(0.73)     | 0.804( <b>0.96</b> )            | 0.272(0.68)   | -0.0849(0.56)   |
| <i>MEI4</i>                                      | -0.828( <b>0.97</b> )   | 0.392(0.83)   | -0.407(0.80)    | -0.826( <b>0.96</b> )           | -0.0236(0.52) | -0.184(0.62)    |
| <i>REC114</i>                                    | -0.491(0.81)            | -0.0628(0.52) | -0.125(0.58)    | -0.499(0.80)                    | -0.148(0.61)  | -0.186(0.62)    |
| <i>IHO1</i>                                      | 0.483(0.82)             | 0.094(0.59)   | 0.0451(0.53)    | 0.551(0.85)                     | -0.0291(0.53) | 0.0124(0.50)    |
| <i>SPO11</i>                                     | 0.505(0.82)             | -0.0492(0.54) | -0.0867(0.56)   | 0.592(0.86)                     | 0.0144(0.51)  | -0.0861(0.45)   |
| <b>(B) DSB Processing</b>                        |                         |               |                 |                                 |               |                 |
| <i>HORMAD2</i>                                   | 0.187(0.63)             | 0.361(0.78)   | 0.308(0.69)     | 0.13(0.59)                      | 0.197(0.65)   | 0.255(0.66)     |
| <i>MRE11</i>                                     | -0.448(0.83)            | 0.431(0.85)   | -0.292(0.71)    | -0.346(0.78)                    | -0.272(0.74)  | -0.129(0.60)    |
| <i>NBS1</i>                                      | -0.727(0.94)            | -0.198(0.65)  | 0.18(0.62)      | -0.741(0.94)                    | -0.0171(0.56) | 0.04(0.53)      |
| <i>RAD50</i>                                     | -0.38(0.77)             | -0.0902(0.58) | 0.165(0.62)     | -0.398(0.76)                    | 0.0103(0.51)  | 0.146(0.60)     |
| <i>BRCC3</i>                                     | 0.0833(0.56)            | 0.196(0.70)   | 0.0644(0.55)    | 0.0795(0.55)                    | 0.082(0.57)   | 0.0646(0.54)    |
| <b>(C) Homology Search &amp; Strand Invasion</b> |                         |               |                 |                                 |               |                 |
| <i>DMC1</i>                                      | 0.302(0.69)             | -0.0885(0.59) | -0.0647(0.55)   | 0.322(0.69)                     | -0.0377(0.54) | -0.0296(0.52)   |
| <i>RAD51</i>                                     | -0.31(0.52)             | -0.348(0.78)  | 0.00623(0.50)   | -0.0216(0.51)                   | -0.17(0.64)   | -0.0073(0.49)   |
| <i>SPATA22</i>                                   | -0.17(0.61)             | 0.219(0.72)   | -0.0861(0.57)   | -0.151(0.60)                    | 0.104(0.59)   | -0.0585(0.54)   |
| <i>MEIOB</i>                                     | 0.147(0.59)             | -0.402(0.85)  | 0.0146(0.49)    | 0.204(0.62)                     | -0.262(0.71)  | 0.105(0.57)     |
| <i>MCMD2</i>                                     | -0.469(0.83)            | 0.179(0.64)   | -0.584(0.86)    | -0.492(0.83)                    | -0.235(0.68)  | -0.574(0.85)    |

| Gene                       | Correlation Coefficient |               |                 | Partial Correlation Coefficient |                       |                      |
|----------------------------|-------------------------|---------------|-----------------|---------------------------------|-----------------------|----------------------|
|                            | dS - $\omega$           | dS - MLH1     | $\omega$ - MLH1 | dS - $\omega$                   | dS - MLH1             | $\omega$ - MLH1      |
| <b>(D) Synapsis</b>        |                         |               |                 |                                 |                       |                      |
| <i>REC8</i>                | -0.537(0.84)            | -0.0298(0.51) | 0.238(0.65)     | -0.572(0.85)                    | 0.136(0.61)           | 0.284(0.68)          |
| <i>RAD21L</i>              | -0.517(0.84)            | -0.0528(0.55) | 0.447(0.78)     | -0.566(0.85)                    | 0.279(0.71)           | 0.54(0.82)           |
| <i>SYCP1</i>               | -0.0366(0.53)           | 0.135(0.65)   | 0.152(0.60)     | -0.0375(0.53)                   | 0.0785(0.58)          | 0.178(0.61)          |
| <i>SYCP2</i>               | 0.286(0.69)             | -0.257(0.74)  | -0.0292(0.52)   | 0.344(0.74)                     | -0.181(0.66)          | 0.0549(0.53)         |
| <i>TEX12</i>               | 0.207(0.62)             | 0.263(0.67)   | 0.0829(0.54)    | 0.221(0.64)                     | 0.156(0.62)           | 0.0158(0.50)         |
| <b>(E) CO/NCO Decision</b> |                         |               |                 |                                 |                       |                      |
| <i>TEX11</i>               | 0.168(0.64)             | -0.449(0.90)  | 0.577(0.9)      | 0.736( <b>0.97</b> )            | -0.752( <b>0.97</b> ) | 0.813( <b>0.97</b> ) |
| <i>SHOC1</i>               | -0.683(0.94)            | 0.0205(0.52)  | 0.19(0.64)      | -0.748( <b>0.95</b> )           | 0.217(0.67)           | 0.287(0.70)          |
| <i>RNF212</i>              | 0.0404(0.52)            | 0.0305(0.53)  | -0.11(0.57)     | 0.0479(0.52)                    | 0.0213(0.52)          | -0.102(0.44)         |
| <i>MSH4</i>                | -0.792( <b>0.97</b> )   | 0.0886(0.60)  | 0.163(0.61)     | -0.88( <b>0.99</b> )            | 0.336(0.74)           | 0.376(0.74)          |
| <i>MSH5</i>                | 0.0407(0.53)            | -0.176(0.69)  | 0.0243(0.51)    | 0.069(0.55)                     | -0.122(0.61)          | 0.0347(0.52)         |
| <b>(F) Resolution</b>      |                         |               |                 |                                 |                       |                      |
| <i>MER3</i>                | -0.493(0.82)            | -0.133(0.64)  | 0.0393(0.54)    | -0.542(0.85)                    | -0.0901(0.59)         | -0.0296(0.52)        |
| <i>CNTD1</i>               | -0.836( <b>0.97</b> )   | -0.401(0.78)  | 0.501(0.82)     | -0.78( <b>0.96</b> )            | 0.0968(0.57)          | 0.334(0.72)          |
| <i>HEI10</i>               | -0.284(0.69)            | -0.594(0.93)  | 0.326(0.69)     | -0.164(0.60)                    | -0.27(0.70)           | 0.276(0.67)          |
| <i>MLH1</i>                | 0.146(0.60)             | 0.00648(0.51) | 0.14(0.59)      | 0.184(0.63)                     | -0.0267(0.52)         | 0.151(0.59)          |
| <i>MLH3</i>                | -0.108(0.58)            | -0.0165(0.51) | -0.294(0.69)    | -0.12(0.41)                     | -0.0762(0.57)         | -0.319(0.70)         |
| <i>MUS81</i>               | 0.307(0.72)             | -0.167(0.65)  | -0.0922(0.57)   | 0.343(0.72)                     | -0.097(0.58)          | -0.0469(0.54)        |
| <b>Average</b>             | -0.137                  | -0.007        | 0.068           | -0.115                          | -0.019                | 0.058                |
| <b>SD</b>                  | 0.465                   | 0.261         | 0.252           | 0.486                           | 0.212                 | 0.260                |

24 **Figure S1:** High concordance in evolutionary rate compute across mammals and between humans and macaque.  
25 The best-fit regression line is shown in red and the 1:1 line is shown as a dashed line.

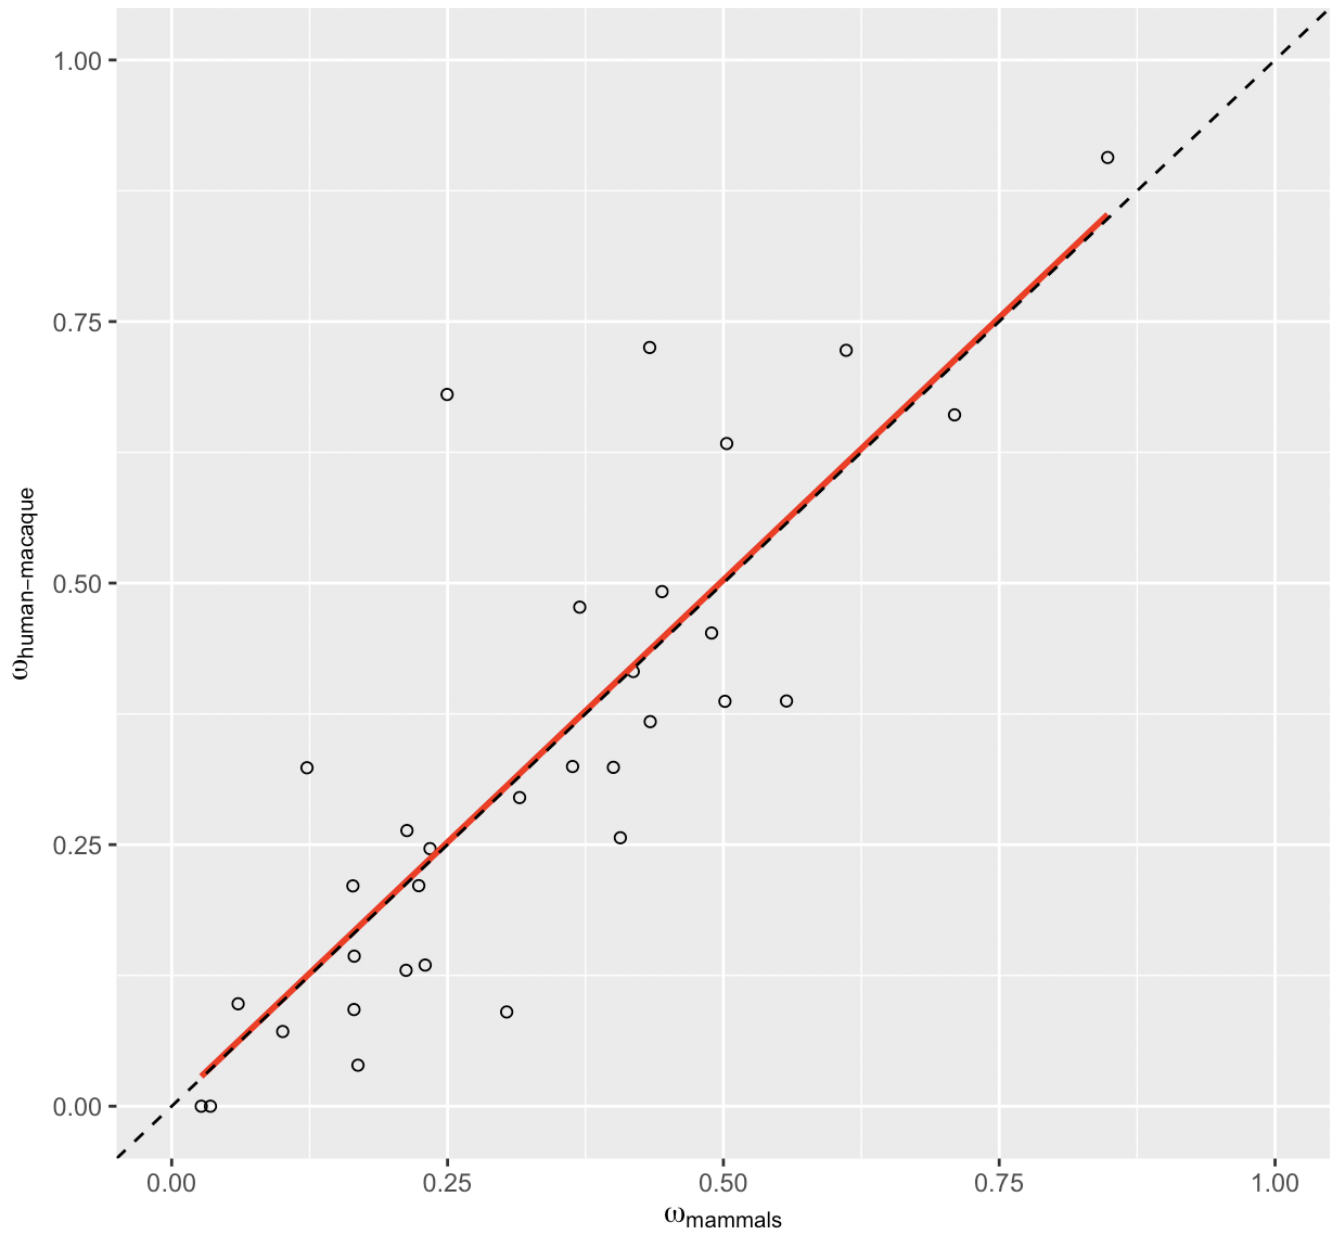

26

## References

- Al-Jaru, A., W. Goodwin, J. Skidmore, and K. Khazanehdari. 2014. Distribution of *mlh1* foci in horse male synaptonemal complex. *Cytogenetic and genome research* 142(2):87–94.
- Barrett, T., S. E. Wilhite, P. Ledoux, C. Evangelista, I. F. Kim, M. Tomashevsky, K. A. Marshall, K. H. Phillippy, P. M. Sherman, M. Holko et al. 2012. Ncbi geo: archive for functional genomics data sets—update. *Nucleic acids research* 41(D1):D991–D995.
- Brawand, D., M. Soumillon, A. Necsulea, P. Julien, G. Csárdi, P. Harrigan, M. Weier, A. Liechti, A. Aximu-Petri, M. Kircher et al. 2011. The evolution of gene expression levels in mammalian organs. *Nature* 478(7369):343.
- Carelli, F. N., T. Hayakawa, Y. Go, H. Imai, M. Warnefors, and H. Kaessmann. 2016. The life history of retrocopies illuminates the evolution of new mammalian genes. *Genome research* :gr-198473.
- Coleman, S. J., Z. Zeng, M. S. Hestand, J. Liu, and J. N. Macleod. 2013. Analysis of unannotated equine transcripts identified by mRNA sequencing. *PLoS One* 8(7):e70125.
- Cortez, D., R. Marin, D. Toledo-Flores, L. Froidevaux, A. Liechti, P. D. Waters, F. Gruetzner, and H. Kaessmann. 2014. Origins and functional evolution of Y chromosomes across mammals. *Nature* 508(7497):488.
- Derti, A., P. Garrett-Engle, K. D. MacIsaac, R. C. Stevens, S. Sriram, R. Chen, C. A. Rohl, J. M. Johnson, and T. Babak. 2012. A quantitative atlas of polyadenylation in five mammals. *Genome research* :gr-132563.
- Dumont, B. L. and B. A. Payseur. 2011. Evolution of the genomic recombination rate in murid rodents. *Genetics* 187(3):643–657.
- Fan, Y., Z.-Y. Huang, C.-C. Cao, C.-S. Chen, Y.-X. Chen, D.-D. Fan, J. He, H.-L. Hou, L. Hu, X.-T. Hu et al. 2013. Genome of the Chinese tree shrew. *Nature communications* 4:1426.
- Fröhlich, J., M. Vozdova, S. Kubickova, H. Cernohorska, H. Sebestova, and J. Rubes. 2015. Variation of meiotic recombination rates and *mlh1* foci distribution in spermatocytes of cattle, sheep and goats. *Cytogenetic and genome research* 146(3):211–221.
- Guan, Y., G. Liang, G. B. Martin et al. 2017. Functional changes in mRNA expression and alternative pre-mRNA splicing associated with the effects of nutrition on apoptosis and spermatogenesis in the adult testis. *BMC genomics* 18(1):64.

53 Hassold, T., T. Hansen, P. Hunt, and C. VandeVoort. 2009. Cytological studies of recombination in rhesus males.  
54 Cytogenetic and genome research 124(2):132–138.

55 Hassold, T., L. Judis, E. Chan, S. Schwartz, A. Seftel, and A. Lynn. 2004. Cytological studies of meiotic recombination  
56 in human males. Cytogenetic and genome research 107(3-4):249–255.

57 International Sheep Genomics Consortium, A. Archibald, N. Cockett, B. Dalrymple, T. Faraut, J. Kijas, J. Maddox,  
58 J. McEwan, V. Hutton Oddy, H. Raadsma et al. 2010. The sheep genome reference sequence: a work in progress.  
59 Animal genetics 41(5):449–453.

60 Li, Y., J. Li, C. Fang, L. Shi, J. Tan, Y. Xiong, B. Fan, and C. Li. 2016. Genome-wide differential expression of  
61 genes and small rnas in testis of two different porcine breeds and at two different ages. Scientific reports 6:26852.

62 Lindblad-Toh, K., C. M. Wade, T. S. Mikkelsen, E. K. Karlsson, D. B. Jaffe, M. Kamal, M. Clamp, J. L. Chang,  
63 E. J. Kulbokas III, M. C. Zody et al. 2005. Genome sequence, comparative analysis and haplotype structure of  
64 the domestic dog. Nature 438(7069):803.

65 Locke, D. P., L. W. Hillier, W. C. Warren, K. C. Worley, L. V. Nazareth, D. M. Muzny, S.-P. Yang, Z. Wang,  
66 A. T. Chinwalla, P. Minx et al. 2011. Comparative and demographic analysis of orang-utan genomes. Nature  
67 469(7331):529.

68 Mary, N., H. Barasc, S. Ferchaud, Y. Billon, F. Meslier, D. Robelin, A. Calgaro, A.-M. Loustau-Dudez, N. Bonnet,  
69 M. Yerle et al. 2014. Meiotic recombination analyses of individual chromosomes in male domestic pigs (*sus scrofa*  
70 *domestica*). PLoS One 9(6):e99123.

71 Merkin, J., C. Russell, P. Chen, and C. B. Burge. 2012. Evolutionary dynamics of gene and isoform regulation in  
72 mammalian tissues. Science 338(6114):1593–1599.

73 O’Leary, N. A., M. W. Wright, J. R. Brister, S. Ciufu, D. Haddad, R. McVeigh, B. Rajput, B. Robbertse, B. Smith-  
74 White, D. Ako-Adjei et al. 2015. Reference sequence (RefSeq) database at NCBI: current status, taxonomic  
75 expansion, and functional annotation. Nucleic acids research 44(D1):D733–D745.

76 Prüfer, K., K. Munch, I. Hellmann, K. Akagi, J. R. Miller, B. Walenz, S. Koren, G. Sutton, C. Kodira, R. Winer  
77 et al. 2012. The bonobo genome compared with the chimpanzee and human genomes. Nature 486(7404):527.

78 Rat Genome Sequencing Project Consortium et al. 2004. Genome sequence of the brown norway rat yields insights  
79 into mammalian evolution. *Nature* 428(6982):493.

80 Scally, A., J. Y. Dutheil, L. W. Hillier, G. E. Jordan, I. Goodhead, J. Herrero, A. Hobolth, T. Lappalainen,  
81 T. Mailund, T. Marques-Bonet et al. 2012. Insights into hominid evolution from the gorilla genome sequence.  
82 *Nature* 483(7388):169.

83 The Chimpanzee Sequencing Analysis Consortium, R. H. Waterson, E. S. Lander, and R. K. Wilson. 2005. Initial  
84 sequence of the chimpanzee genome and comparison with the human genome. *Nature* 437(7055):69.

85 Vandeweghe, M. W., R. N. Platt, D. A. Ray, and F. G. Hoffmann. 2016. Transposable element targeting by piRNAs  
86 in Laurasiatherians with distinct transposable element histories. *Genome biology and evolution* 8(5):1327–1337.

87 Wade, C., E. Giulotto, S. Sigurdsson, M. Zoli, S. Gnerre, F. Imsland, T. Lear, D. Adelson, E. Bailey, R. Bellone  
88 et al. 2009. Genome sequence, comparative analysis, and population genetics of the domestic horse. *Science*  
89 326(5954):865–867.

90 Yang, Y., G. Liang, G. Niu, Y. Zhang, R. Zhou, Y. Wang, Y. Mu, Z. Tang, and K. Li. 2017. Comparative analysis  
91 of dna methylome and transcriptome of skeletal muscle in lean-, obese-, and mini-type pigs. *Scientific reports*  
92 7:39883.

93 Yang, Z. 2007. Paml 4: Phylogenetic analysis by maximum likelihood. *Molecular Biology and Evolution* 24(8):1586–  
94 1591. doi:10.1093/molbev/msm088.

95 Yang, Z. and R. Nielsen. 2000. Estimating synonymous and nonsynonymous substitution rates under realistic  
96 evolutionary models. *Molecular Biology and Evolution* 17(1):32–43.

97 Zerbino, D. R., P. Achuthan, W. Akanni, M. R. Amode, D. Barrell, J. Bhai, K. Billis, C. Cummins, A. Gall, C. G.  
98 Girón et al. 2017. Ensembl 2018. *Nucleic acids research* 46(D1):D754–D761.

99 Zimin, A. V., A. S. Cornish, M. D. Maudhoo, R. M. Gibbs, X. Zhang, S. Pandey, D. T. Meehan, K. Wipfler, S. E.  
100 Bosinger, Z. P. Johnson et al. 2014. A new rhesus macaque assembly and annotation for next-generation sequencing  
101 analyses. *Biology direct* 9(1):20.

102 Zimin, A. V., A. L. Delcher, L. Florea, D. R. Kelley, M. C. Schatz, D. Puiu, F. Hanrahan, G. Pertea, C. P. Van Tassell,  
103 T. S. Sonstegard et al. 2009. A whole-genome assembly of the domestic cow, *Bos taurus*. *Genome biology* 10(4):R42.
